# Supplementary material
Source: PubMed Central journal article supplement (PMC8782684)
Supplement: 127_2021_2211_MOESM2_ESM.pdf [file 127_2021_2211_MOESM2_ESM.pdf]

## The HEROES study group

### **Armenia**

Anna Isahakyan  
National Institute of Health of Armenia

Khachatur Gasparyan  
Yerevan State Medical University

Alexander Bazarchyan  
National Institute of Health Armenia

### **Argentina**

Gabriel Sendra  
Ministerio de Salud, Desarrollo Social y Deportes de Mendoza

### **Belgium**

Els Duysburgh  
Laure Mortgat  
Sciensano

### **Bolivia**

Maria Teresa  
Instituto de Ciencias de la Salud, Universidad de O'Higgins

### **Brazil**

Dinarte Ballesteres  
Hospital Universitário  
Universidade Federal do Rio Grande

Maria Tavares Calvanti  
Faculty of Medicine  
Universidade Federal do Rio de Janeiro

### **Chile**

Jorge Ramírez  
Gonzalo Soto  
Universidad de Chile

Antonia Aguirre  
Corporación Municipal de Renca

Carolina Traub  
Jaime Sapag  
Paula Bedregal

Pontificia Universidad Católica de Chile

Margarita Cortés  
Rodrigo Goycolea  
Universidad Central de Chile

Gonzalo Cuadra  
Colegio Médico

Ítalo Lanio  
Universidad de Valparaíso

María Soledad Burrone  
Universidad de O'Higgins

Sebastián Villarroel  
Servicio de Salud del Reloncaví

Rodrigo Goycolea Martinic, Facultad de Ciencias de la Salud, Universidad Central de Chile.

Thamara Tapia  
Department of Behavioural Science and Health, University College London

### **Colombia**

Nilton Montoya  
Hugo Grisales  
Javier Contreras  
Eliana Martínez  
School of public health. University of Antioquia

Adriana Maldonado  
El Bosque University

Julian Santaella-Torino  
University of El Valle.

Neil Pearce  
Karin Van-Veldhoven  
Tim Rhodes  
London School of Hygiene and tropical Medicine

### **Czech Republic**

MUDr. Jana Šeblová, Ph.D.  
Czech Society for Emergency and Disaster  
Medicine CzMA JEP  
Emergency Department Motol University  
Hospital, Prague

MUDr. Dita Protopopová, Ph.D.  
Ministry of Health of the Czech Republic

### **Ecuador**

Sandra Muñoz  
Ministerio de Salud Pública, Guayaquil

Andrés Peralta  
Agència de Salut Pública de Barcelona, Barcelona, Spain

**Germany**

Felix Sisenop  
University of Applied Sciences Emden/Leer, Emden

**Guatemala**

Alejandra Paniagua-Avila  
Department of Epidemiology, Columbia University Mailman School of Public Health

Dorian E. Ramirez  
Aida Barrera-Perez  
Facultad de Ciencias Médicas, Universidad de San Carlos de Guatemala

Erwin Calgua  
Facultad de Ciencias Médicas, Universidad de San Carlos de Guatemala  
Center for Global Health, Perelman School of Medicine, University of Pennsylvania

Claudia Castro  
Independent researcher, Guatemala City

Ana Peralta-Garcia  
School of Public Health & Tropical Medicine, Tulane University, ~~New Orleans~~

**Italy**

Mauro Giovanni Carta  
Peter Kurotschka  
Alessandra Perra  
University of Cagliari

Gemma Calamandrei  
Angelo Picardi  
Flavia Chiarotti  
National Institute of Health

Venerando Rapisarda  
University of Catania

Giuseppe La Torre  
University Umberto I, Rome

Ferdinando Romano  
University La Sapienza, Rome

Valentina Di Mattei  
University Vita Salute San Raffaele, Milan  
Emanuele Preti

University Bicocca, Milan

Ranieri Poli  
Azienda Ospedaliera Universitaria Integrata di Verona

### **Japan**

Hiroki Asaoka  
Kotaro Imamura  
Norito Kawakami  
Department of Mental Health, University of Tokyo

### **Lebanon**

Elie Karam  
Georges Karam  
Rita Khoury  
Aimee Nasser Karam  
Institute for Development, Research, Advocacy and Applied Care (IDRAAC)  
Department of Psychiatry and Clinical Psychology, University of Balamand Faculty of Medicine  
Department of Psychiatry and Clinical Psychology, St George Hospital University Medical Center

### **Mexico**

Jaime Carmona Huerta  
Instituto Jalisciense de Salud Mental

Santiago Castiello de Obeso  
Department of Experimental Psychology, University of Oxford & University of Guadalajara

Omar Náfate López  
Hospital de Especialidades Pediátricas del Centro Regional de Alta Especialidad del Estado de Chiapas

Eduardo Madrigal de León  
Instituto Nacional de Psiquiatría Ramón de la Fuente Muñiz

### **Nigeria**

Olusegun I. OLAOPA  
Department of Oral and Maxillofacial Surgery, University College Hospital

Oyeyemi A. AFOLABI  
Department of Psychiatry, University College Hospital

Oye Gureje  
World Health Organization Collaborating Centre for Research and Training in Mental Health, Neurosciences and Substance Abuse, Department of Psychiatry, University of Ibadan

**Peru**

María Gioconda Coronel Altamirano  
María de los Ángeles Mendoza Vilca  
Yuri Licinio Cutipé Cárdenas  
July Esther Caballero Peralta  
Ministerio de Salud - Dirección de Salud Mental

Yolanda Elvira Angulo Bazán  
Instituto Nacional de Salud

Mónica de los Milagros Cassaretto Bardales  
Tesania Eva Velázquez Castro  
Departamento de Psicología, Pontificia Universidad Católica del Perú

Marta Rondon Rondon  
Instituto Nacional Materno Perinatal

Jessica Raquel Pérez Andrade  
Grupo de Investigación Edades de la Vida y Educación, Pontificia Universidad Católica del Perú

**Puerto Rico**

Ruthmarie Hernández  
Graduate Student  
School of Behavioral and Brain Sciences  
Ponce Health Sciences University

Ernesto Rosario-Hernández  
Professor  
School of Behavioral and Brain Sciences  
Ponce Health Sciences University

Irma Torres Rivera  
Clinical Psychologist  
NeoMed Center Inc.  
Federal Qualified Health Center

Alíxida Ramos-Pibernus  
Assistant Professor  
School of Behavioral and Brain Sciences  
Ponce Health Sciences University

Marijulie Martínez Lozano  
Biostatistician  
Center for Clinical Research and Health Promotion  
University of Puerto Rico, Medical Sciences Campus

Ángel Pérez Caro  
Graduate Student  
School of Public Health  
Ponce Health Sciences University

**Saudi Arabia**

Suliman Alghnam  
King Abdulah International Medical Research Center

**Spain**

Marife Bravo  
Jorge Andreo  
Hospital La Paz Institute for Health Research (IdiPAZ), Madrid

Irene Martinez-Morata  
Department of Environmental Health Sciences, Columbia University Mailman School of Public Health  
Institute for Biomedical Research of Murcia (IMIB-Arrixaca)  
Fabiola Jaramillo  
Andalusian School of Public Health  
Program of Mental Health, Universidad de Chile

Inés Morán-Sánchez  
Institute for Biomedical Research of Murcia (IMIB-Arrixaca)  
Cartagena Mental Health Centre, Health Service of Murcia

Berta Moreno-Küstner  
Department of Personality, Assessment and Psychological Treatment, University of Malaga

Sergio Minué  
Andalusian School of Public Health

Alberto Torres-Cantero  
Department of Preventive Medicine, Virgen de la Arrixaca Hospital

José Luis Ayuso-Mateos  
Department of Psychiatry, Universidad Autónoma de Madrid (UAM)  
Institute of Health Carlos III, Centro de Investigación Biomédica en Red de Salud Mental (CIBERSAM)  
Department of Psychiatry, La Princesa University Hospital, Instituto de Investigación Sanitaria Princesa (IIS-Princesa)

**South Africa**

Jacqueline Hoare  
School of Public Health & Family Medicine, University of Cape Town

**Tunisia**

Dorra Khattech  
Fethi Nacef  
Department Psychiatry A, Razi Hospital La Manouba

Amira Jamoussi  
Medical ICU, Abderrahmane Mami Hospital Ariana

Ines Feki  
Department Psychiatry A, Hedi Chaker Hospital Sfax

**The Netherlands**

Afra van der Markt  
Amsterdam UMC, Vrije Universiteit Amsterdam, Psychiatry, Amsterdam Public Health Research  
Institute

Frederike Schirmbeck  
Amsterdam University Medical Center, Location Meibergdreef, University of Amsterdam,  
Department of Psychiatry, Amsterdam  
Arkin Institute for Mental Health, Amsterdam

Wim Veling  
Department of Psychiatry, University Medical Center Groningen, Groningen

Bart Rutten  
Department of Psychiatry and Neuropsychology, School of Mental Health and Neuroscience,  
Maastricht University

Johnatan Martis  
Vakgroep Huisartsgeneeskunde, Maastricht University, Maastricht

**Turkey**

İlker Kayı  
Koç University

Şenol Turan  
Istanbul University

Hülya Arslantaş  
Adnan Menderes University

**Uruguay**

Luis Giménez  
Facultad de Psicología, Universidad de la República

**Venezuela**

Francis Saavedra  
Instituto Altos Estudios Dr Arnoldo Gabaldon

**World Health Organization**

Andrea Bruni  
Renato Oliveira e Souza
